# Supplementary material
Source: Springer Nature journal article supplement (https://www.springermedizin.de/resource/supplementary/12888_2011_956_MOESM1_ESM.pdf/9478962)

Alpha-Linolenic Acid Intake (grams/day)

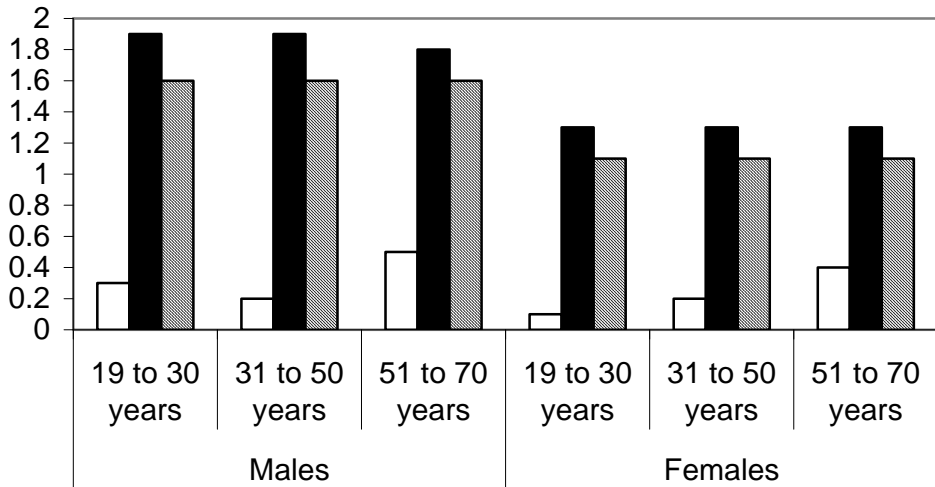

□ Study ■ BCNS ▨ Adequate Intakes

Supplement: MOESM1 [file 9478962]
